# Supplementary material for: Use of Labor Neuraxial Analgesia for Vaginal Delivery and Severe Maternal Morbidity
Source: PubMed Central journal article supplement (PMC8864505; doi:10.1001/jamanetworkopen.2022.0137), 2022-02-22
Supplement: jamanetwopen-e220137-s001.pdf [file jamanetwopen-e220137-s001.pdf]

## Supplemental Online Content

Guglielminotti J, Landau R, Daw J, Friedman AM, Chihuri S, Li G. Use of labor neuraxial analgesia for vaginal delivery and severe maternal morbidity. *JAMA Netw Open*. 2022;5(2):e220137.

doi:10.1001/jamanetworkopen.2022.0137

**eTable 1.** Comparison of women included in the study sample and women excluded for missing information on anesthesia care

**eTable 2.** *ICD-9-CM* and *ICD-10-CM* codes used in this study

**eTable 3.** Variables included in the propensity score

**eFigure 1.** Distribution of the stabilized weights

**eFigure 2.** The unified interaction and mediation analysis framework

**eFigure 3.** Flowchart of the study

**eTable 4.** Comparison of women who did not receive neuraxial analgesia for vaginal delivery and those who did, before and after propensity-score matching

**eTable 5.** Odds ratios of postpartum hemorrhage associated with neuraxial analgesia for vaginal delivery with the successive addition of patient and hospital characteristics in the propensity score used for weighting

**eTable 6.** Odds ratios of postpartum hemorrhage associated with neuraxial analgesia for vaginal delivery with the individual addition of each of the hospital characteristics to the propensity score used for weighting

This supplementary material has been provided by the authors to give readers additional information about their work.

**eTable 1.** Comparison of women included in the study sample and women excluded for missing information on anesthesia care (New York State hospitals, 2010-2017)

189,825 women had missing information on anesthesia care but 13,665 had another exclusion criteria leading to 176,160 women excluded only because of missing information on anesthesia care.

|                                        | <b>Study sample<br/>(n = 575,524)</b> | <b>Missing information on anesthesia care<br/>(n = 176,160)</b> | <b>SMD</b>   |
|----------------------------------------|---------------------------------------|-----------------------------------------------------------------|--------------|
| <i>General characteristics</i>         |                                       |                                                                 |              |
| Age (year)                             |                                       |                                                                 | <b>16.3%</b> |
| ≤ 19                                   | 39,577 (6.9%)                         | 8919 (5.1%)                                                     |              |
| 20-29                                  | 285,376 (49.6%)                       | 76,891 (43.6%)                                                  |              |
| 30-39                                  | 232,432 (40.4%)                       | 83,021 (47.1%)                                                  |              |
| ≥ 40                                   | 18,139 (3.2%)                         | 7329 (4.2%)                                                     |              |
| Race                                   |                                       |                                                                 | <b>15.6%</b> |
| Non-Hispanic White                     | 258,276 (45.1%)                       | 74,274 (42.2%)                                                  |              |
| Non-Hispanic Black                     | 88,577 (15.5%)                        | 25,062 (14.2%)                                                  |              |
| Hispanic                               | 104,866 (18.3%)                       | 28,147 (16.0%)                                                  |              |
| Non-Hispanic Asian or Pacific Islander | 46,065 (8.0%)                         | 19,611 (11.1%)                                                  |              |
| Other                                  | 74,534 (13.0%)                        | 28,976 (16.5%)                                                  |              |
| Rural residence                        | 31,778 (5.5%)                         | 12,210 (6.9%)                                                   | 5.8%         |
| Insurance type                         |                                       |                                                                 | <b>22.4%</b> |
| Medicaid                               | 283,867 (49.3%)                       | 75,644 (42.9%)                                                  |              |
| Medicare                               | 2483 (0.4%)                           | 629 (0.4%)                                                      |              |
| Private                                | 259,343 (45.1%)                       | 95,877 (54.4%)                                                  |              |
| Self-pay (uninsured)                   | 15,848 (2.8%)                         | 1944 (1.1%)                                                     |              |
| Other                                  | 13,980 (2.4%)                         | 2044 (1.2%)                                                     |              |
| CMI-OB ≥ 1                             | 175,178 (30.4%)                       | 58,870 (33.4%)                                                  | 6.4%         |
| Obesity                                | 28,928 (5.0%)                         | 8993 (5.1%)                                                     | <0.1%        |

**eTable 1 (continued)**

|                                                                          | <b>Study sample<br/>(n = 575,524)</b> | <b>Missing information on anesthesia care<br/>(n = 176,160)</b> | <b>SMD</b>   |
|--------------------------------------------------------------------------|---------------------------------------|-----------------------------------------------------------------|--------------|
| <i>Possible contraindications to neuraxial anesthesia</i>                |                                       |                                                                 |              |
| Coagulation factor deficit, Von Willebrand disease, and thrombocytopenia | 11,864 (2.1%)                         | 3721 (2.1%)                                                     | <0.1%        |
| Fever or infection during labor                                          | 5046 (0.9%)                           | 1920 (1.1%)                                                     | 2.2%         |
| Chorioamnionitis                                                         | 13,666 (2.4%)                         | 3491 (2.0%)                                                     | 2.7%         |
| <i>Pregnancy and labor characteristics</i>                               |                                       |                                                                 |              |
| Admission for delivery during a weekend                                  | 136,748 (23.8%)                       | 42,366 (24.0%)                                                  | <0.1%        |
| Pregnancy resulting from ART                                             | 1701 (0.3%)                           | 416 (0.2%)                                                      | 1.2%         |
| Previous cesarean delivery                                               | 15,733 (2.7%)                         | 4154 (2.4%)                                                     | 2.4%         |
| Uterus fibroid                                                           | 4877 (0.8%)                           | 1866 (1.1%)                                                     | 2.2%         |
| Polyhydramnios                                                           | 4219 (0.7%)                           | 1324 (0.8%)                                                     | <0.1%        |
| Placenta praevia                                                         | 761 (0.1%)                            | 280 (0.2%)                                                      | <0.1%        |
| Placenta accreta                                                         | 2084 (0.4%)                           | 377 (0.2%)                                                      | 2.8%         |
| Multiple gestation                                                       | 4498 (0.8%)                           | 1230 (0.7%)                                                     | 1.0%         |
| Abnormal presentation                                                    | 17,061 (3.0%)                         | 4105 (2.3%)                                                     | 4.0%         |
| Preterm delivery                                                         | 29,782 (5.2%)                         | 8597 (4.9%)                                                     | 1.3%         |
| Premature rupture of membranes                                           | 41,726 (7.3%)                         | 14,467 (8.2%)                                                   | 3.6%         |
| Induction of labor                                                       | 123,636 (21.5%)                       | 27,562 (15.6%)                                                  | <b>15.1%</b> |
| Abnormal fetal heart rhythm                                              | 88,914 (15.4%)                        | 27,709 (15.7%)                                                  | <0.1%        |

**eTable 1 (continued)**

|                                                                                        | <b>Study sample<br/>(n = 575,524)</b> | <b>Missing information on anesthesia care<br/>(n = 176,160)</b> | <b>SMD</b>   |
|----------------------------------------------------------------------------------------|---------------------------------------|-----------------------------------------------------------------|--------------|
| <i>Hospital characteristics</i>                                                        |                                       |                                                                 |              |
| Teaching hospital                                                                      | 469,894 (81.6%)                       | 154,794 (87.9%)                                                 | <b>17.4%</b> |
| Rural hospital                                                                         | 23,791 (4.1%)                         | 10,693 (6.1%)                                                   | 8.8%         |
| Annual number of deliveries                                                            | 3050 (2003)                           | 3804 (2043)                                                     | <b>37.3%</b> |
| Cesarean delivery rate                                                                 | 33.8% (6.5)                           | 32.9% (5.4)                                                     | <b>16.4%</b> |
| Proportion of induction of labor                                                       | 17.3% (7.7)                           | 14.8% (7.9)                                                     | <b>32.7%</b> |
| Proportion of racial and ethnic minority women                                         | 53.5% (29.4)                          | 56.8% (23.8)                                                    | <b>12.2%</b> |
| Proportion of safety net women (a)                                                     | 51.2% (27.0)                          | 44.1% (23.4)                                                    | <b>28.1%</b> |
| Proportion of women with CMI-OB ≥ 1                                                    | 44.1% (6.9)                           | 46.1% (7.2)                                                     | <b>28.2%</b> |
| Proportion of admission for delivery during a weekend                                  | 20.6% (2.1)                           | 21.2% (1.8)                                                     | <b>29.2%</b> |
| Proportion of neuraxial analgesic or Anesthetic techniques in deliveries               | 45.7% (34.2)                          | 46.2% (39.6)                                                    | 1.4%         |
| Coding intensity                                                                       | 8.1 (1.6)                             | 8.3 (1.6)                                                       | 7.4%         |
| <i>Hospital county characteristics<br/>(per 1000 in-hospital births in the county)</i> |                                       |                                                                 |              |
| Number of obstetricians and gynecologists                                              | 14.1 (4.7)                            | 14.7 (4.0)                                                      | <b>14.6%</b> |
| Number of physician anesthesiologists                                                  | 16.5 (6.7)                            | 17.0 (6.1)                                                      | 7.5%         |
| Number of certified registered nurse anesthetists                                      | 5.6 (5.0)                             | 4.9 (3.2)                                                       | <b>14.7%</b> |
| <i>Other</i>                                                                           |                                       |                                                                 |              |
| Year of delivery                                                                       |                                       |                                                                 | <b>35.2%</b> |
| 2010-2011                                                                              | 171,346 (29.8%)                       | 42,351 (24.0%)                                                  |              |
| 2012-2013                                                                              | 149,022 (25.9%)                       | 37,401 (21.2%)                                                  |              |
| 2014-2015                                                                              | 145,256 (25.2%)                       | 35,709 (20.3%)                                                  |              |
| 2016-2017                                                                              | 109,900 (19.1%)                       | 60,699 (34.5%)                                                  |              |

*Abbreviations:* ART: assisted reproductive technology; CMI-OB: comorbidity index for obstetric patients; SMD: standardized mean difference.

*Footnote:* Results expressed as count (%) or mean (1 standard deviation).

(a) Safety net women are Medicaid beneficiaries, Medicare beneficiaries, and uninsured

**eTable 2.** ICD-9-CM and ICD-10-CM codes used in this study

|                                                                          | ICD-9-CM                   | ICD-10-CM                         |
|--------------------------------------------------------------------------|----------------------------|-----------------------------------|
| <i>Women characteristics</i>                                             |                            |                                   |
| Obesity                                                                  | 278.0, 649.1, V85.3, V85.4 | E66, O99.21, Z68.3, Z68.4         |
| <i>Possible contraindications to neuraxial anesthesia</i>                |                            |                                   |
| Coagulation factor deficit, Von Willebrand disease, and thrombocytopenia | 286, 287                   | D65-D69                           |
| Fever or infection during labor                                          | 659.2, 659.3               | O75.2, O75.3                      |
| Chorioamnionitis                                                         | 658.4                      | O41.1                             |
| <i>Labor characteristics</i>                                             |                            |                                   |
| Pregnancy resulting from assisted reproductive technology                | V23.85                     | O09.819                           |
| Previous cesarean delivery                                               | 654.2                      | O34.21                            |
| Uterus fibroid                                                           | 218                        | D25                               |
| Polyhydramnios                                                           | 657.0                      | O40                               |
| Placenta praevia                                                         | 641.0, 641.1               | O44                               |
| Placenta accreta                                                         | 667.0                      | O43.2                             |
| Multiple gestation                                                       | V27.2-V27.7, 651           | O30, O31, Z37.2-Z37.7, Z37.9      |
| Abnormal presentation                                                    | 652                        | O32                               |
| Preterm delivery                                                         | 644.2                      | O60.1                             |
| Premature rupture of membranes                                           | 658.1                      | O42.0                             |
| Induction of labor                                                       | 73.01, 73.1, 73.4 (proc.)  | 3E033VJ, 3E0P7GC, 0U7C7ZZ (proc.) |
| Abnormal fetal heart rhythm                                              | 763.81-763.83, 659.7       | O76, O77.8                        |

*Abbreviations:* proc.: procedure code.

**eTable 3.** Variables included in the propensity score

Variables included in the propensity score to estimate the individual probability of receiving neuraxial analgesia. The propensity score was estimated using a fixed-effect logistic regression with neuraxial analgesia as the dependent variable and the 37 variables listed in the table below as the independent variables. A complete case analysis was performed with 4967 discharges excluded (0.9%).

| <i>General characteristics</i>                                       |                                                                                         | <i>Coding of continuous variables</i> |
|----------------------------------------------------------------------|-----------------------------------------------------------------------------------------|---------------------------------------|
| 1                                                                    | Age                                                                                     | As continuous                         |
| 2                                                                    | Race (missing = 3206)                                                                   | --                                    |
| 3                                                                    | Insurance type (missing = 3)                                                            | --                                    |
|                                                                      | Interactions between age, race, and insurance                                           |                                       |
| 4                                                                    | Rural residence (missing = 1761)                                                        | --                                    |
| 5                                                                    | Comorbidity index for obstetric patients                                                | As continuous                         |
| 6                                                                    | Obesity                                                                                 | --                                    |
| <i>Possible contraindications to neuraxial anesthesia</i>            |                                                                                         |                                       |
| 7                                                                    | Coagulation factor deficit, Von Willebrand disease, and thrombocytopenia                | --                                    |
| 8                                                                    | Fever or infection during labor                                                         | --                                    |
| 9                                                                    | Chorioamnionitis                                                                        | --                                    |
| <i>Labor and delivery characteristics</i>                            |                                                                                         |                                       |
| 10                                                                   | Admission during a weekend                                                              | --                                    |
| 11                                                                   | Pregnancy resulting from assisted reproductive technology                               | --                                    |
| 12                                                                   | Previous cesarean delivery                                                              | --                                    |
| 13                                                                   | Uterus fibroid                                                                          | --                                    |
| 14                                                                   | Polyhydramnios                                                                          | --                                    |
| 15                                                                   | Placenta praevia                                                                        | --                                    |
| 16                                                                   | Placenta accreta                                                                        | --                                    |
| 17                                                                   | Multiple gestation                                                                      | --                                    |
| 18                                                                   | Abnormal presentation                                                                   | --                                    |
| 19                                                                   | Preterm delivery                                                                        | --                                    |
| 20                                                                   | Premature rupture of membranes                                                          | --                                    |
| 21                                                                   | Induction of labor                                                                      | --                                    |
| 22                                                                   | Abnormal fetal heart rhythm                                                             | --                                    |
| <i>Hospital characteristics</i>                                      |                                                                                         |                                       |
| 23                                                                   | Teaching hospital                                                                       | --                                    |
| 24                                                                   | Rural hospital                                                                          | --                                    |
| 25                                                                   | Annual number of deliveries                                                             | As quadratic                          |
|                                                                      | Interactions between teaching hospital, rural hospital, and annual number of deliveries |                                       |
| 26                                                                   | Cesarean delivery rate                                                                  | As continuous                         |
| 27                                                                   | Proportion of induced of labor                                                          | As continuous                         |
| 28                                                                   | Proportion of racial and ethnic minority women                                          | As quadratic                          |
| 29                                                                   | Proportion of safety net women                                                          | As quadratic                          |
| 30                                                                   | Proportion of women with comorbidity index for obstetric patients $\geq 1$              | As quadratic                          |
| 31                                                                   | Proportion of admission for delivery during a weekend                                   | As continuous                         |
| 32                                                                   | Proportion of neuraxial analgesic or anesthetic techniques in deliveries                | As quadratic                          |
| 33                                                                   | Coding intensity                                                                        | As quadratic                          |
| <i>Hospital county characteristics (per 1000 in-hospital births)</i> |                                                                                         |                                       |
| 34                                                                   | Number of obstetricians and gynecologists                                               | As continuous                         |
| 35                                                                   | Number of physician anesthesiologists                                                   | As continuous                         |
| 36                                                                   | Number of certified registered nurse anesthetist                                        | As continuous                         |
| <i>Other</i>                                                         |                                                                                         |                                       |
| 37                                                                   | Year of delivery                                                                        | As continuous                         |

**eFigure 1.** Distribution of the stabilized weights

Distribution of the stabilized weights in women who did not receive neuraxial analgesia for vaginal delivery and those who did (New York State hospitals, 2010-2017).

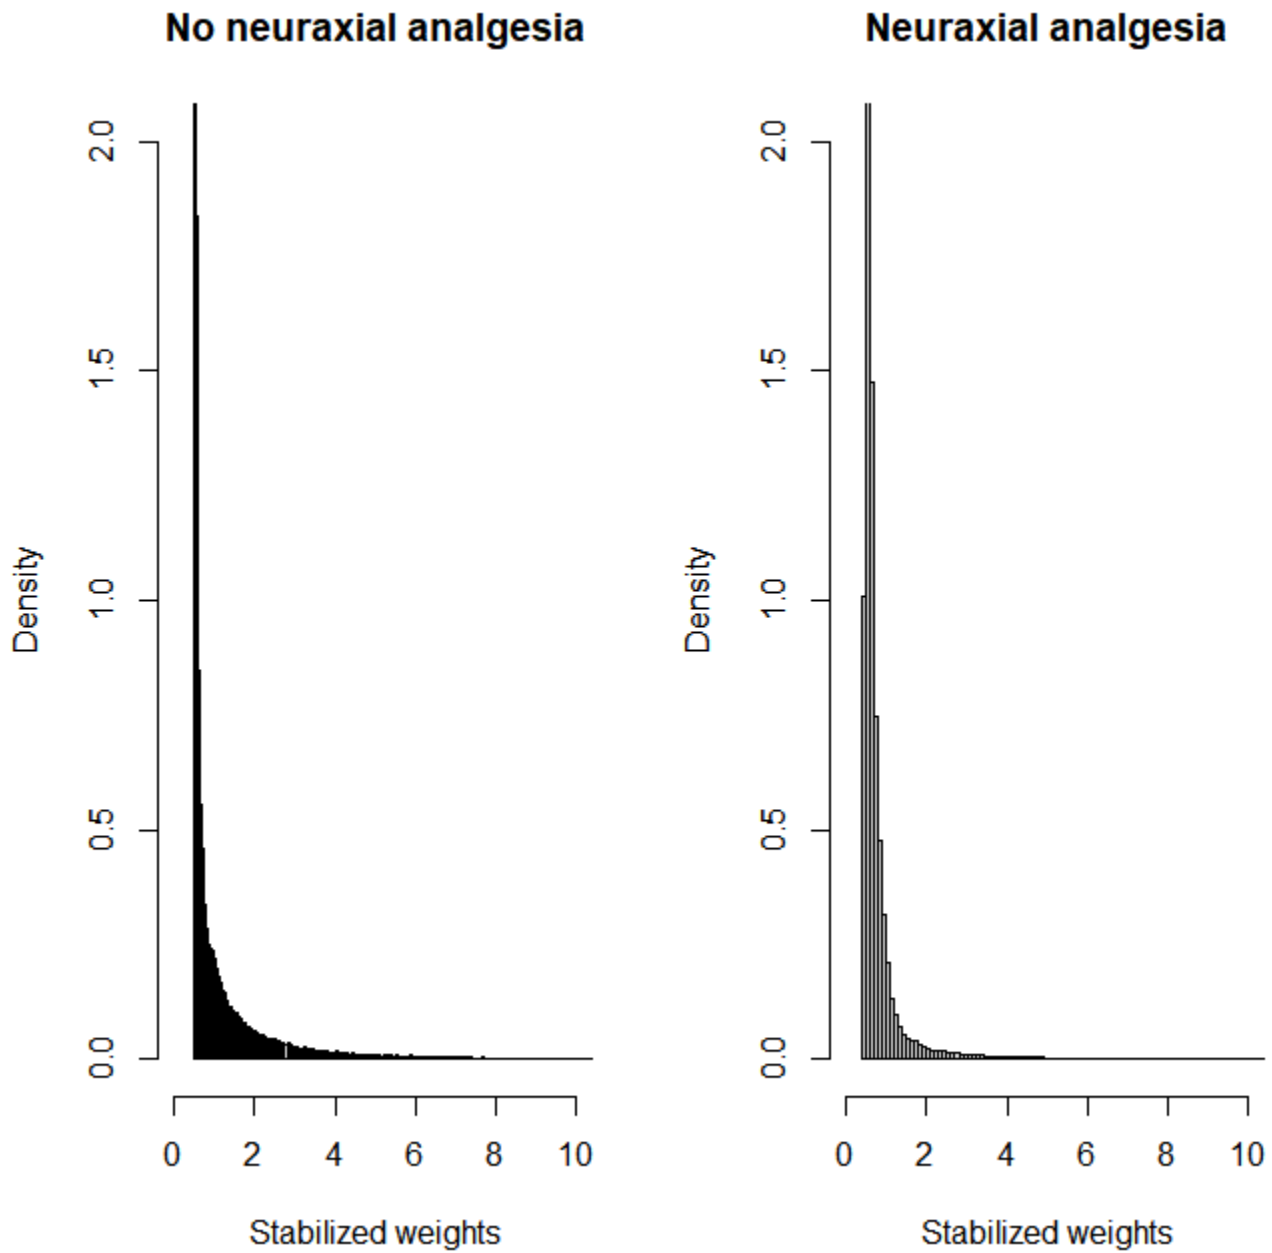

**eFigure 2.** The unified interaction and mediation analysis framework (VanderWeele TJ ‘A unification of mediation and interaction: a 4-way decomposition.’ *Epidemiology* 2014;25(5): 749-761)

The total effect of labor neuraxial analgesia on severe maternal morbidity (SMM) in the presence of post-partum hemorrhage (PPH) is decomposed into 4 components: controlled direct effect, reference interaction effect, mediated interaction effect, and pure indirect effect. The sum of controlled direct effect and reference interaction effect is referred to as the **direct effect**, and the sum of mediated interaction effect and pure indirect effect as the **indirect effect**. The **controlled direct effect** describes the effect of neuraxial analgesia on SMM that is due to neither mediation through nor interaction with PPH. The **reference interaction effect** describes the effect of neuraxial analgesia that is attributable to interaction with PPH but not mediation through PPH. The **mediated interaction effect** describes the effect of neuraxial analgesia that is due to both mediation through and interaction with PPH. The **pure indirect effect** describes the effect of neuraxial analgesia that is attributable to mediation through PPH but not interaction with PPH.

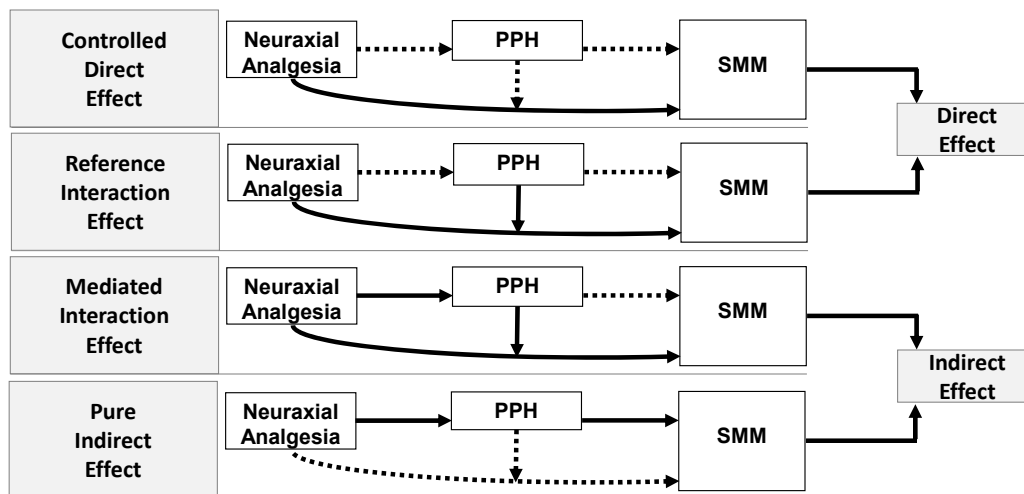

Solid lines indicate path for the effect of interest and dashed lines the effects held constant.

The component effects are estimated through logistic regression modeling. The model for estimating the component effects of the exposure (a) on the outcome (Y) in the presence of a potential moderator (m) with adjustment for other covariates (c) can be expressed as follows:

$$E\{P(Y = 1|a, m, c)\} = \theta_0 + \theta_{1a} + \theta_{2m} + \theta_{3am} + \theta'_{4c} \quad (1)$$

$$E\{P(M = 1|a, c)\} = \beta_0 + \beta_{1a} + \beta'_{2c} \quad (2)$$

Equation (1) models the effects of the exposure (a), moderator (m) and covariates (c) on the outcome (Y), where  $\theta_0$  denotes the intercept,  $\theta_{1a}$  the exposure effect,  $\theta_{2m}$  the moderator effect,  $\theta_{3am}$  the interaction effect between the exposure and the moderator, and  $\theta'_{4c}$  the effects of covariates. Equation (2) models the effect of the exposure and covariates on the moderator where  $\beta_0$  denotes the intercept,  $\beta_{1a}$  the exposure effect on the moderator and  $\beta'_{2c}$  the effects of covariates on the moderator. If the exposure variable and the moderator variable are binary, the total effect of the exposure (a) on the outcome (Y) can be expressed as the sum of four components as follows:

Total effect of exposure =  $(Y_{10} - Y_{00}) + (Y_{11} - Y_{10} - Y_{01} + Y_{00})(M_0) + (Y_{11} - Y_{10} - Y_{01} + Y_{00})(M_1 - M_0) + (Y_{01} - Y_{00})(M_1 - M_0)$ , where  $(Y_{10} - Y_{00})$  is the controlled direct effect, which is represented by  $\theta_{1a}$ ;

$(Y_{11} - Y_{10} - Y_{01} + Y_{00})(M_0)$  is the reference interaction effect, which is equivalent to  $\theta_{3am} \cdot \beta_0$ ;

$(Y_{11} - Y_{10} - Y_{01} + Y_{00})(M_1 - M_0)$  is the mediated interaction effect, which is equivalent to  $\theta_{3am} \cdot \beta_{1a}$ ; and

$(Y_{01} - Y_{00})(M_1 - M_0)$  is the pure indirect effect, which is equivalent to  $\theta_{2m} \cdot \beta_{1a}$ . The NL MIXED procedure in SAS can be used to fit the above hierarchical model and estimate the component effects, and the delta method is used to compute 95% confidence intervals (Chihuri S and Li G ‘Direct and indirect effects of marijuana use on the risk of fatal 2-vehicle crash initiation.’ *Inj Epidemiol* 2020;7(1): 49).



**eFigure 3.** Flowchart of the study

**Abbreviations:** AHA: American Hospital Association; FIPS: Federal Information Processing Standards; SID: state inpatient database; SMM: severe maternal morbidity  
(a) Causes for exclusion are not mutually exclusive

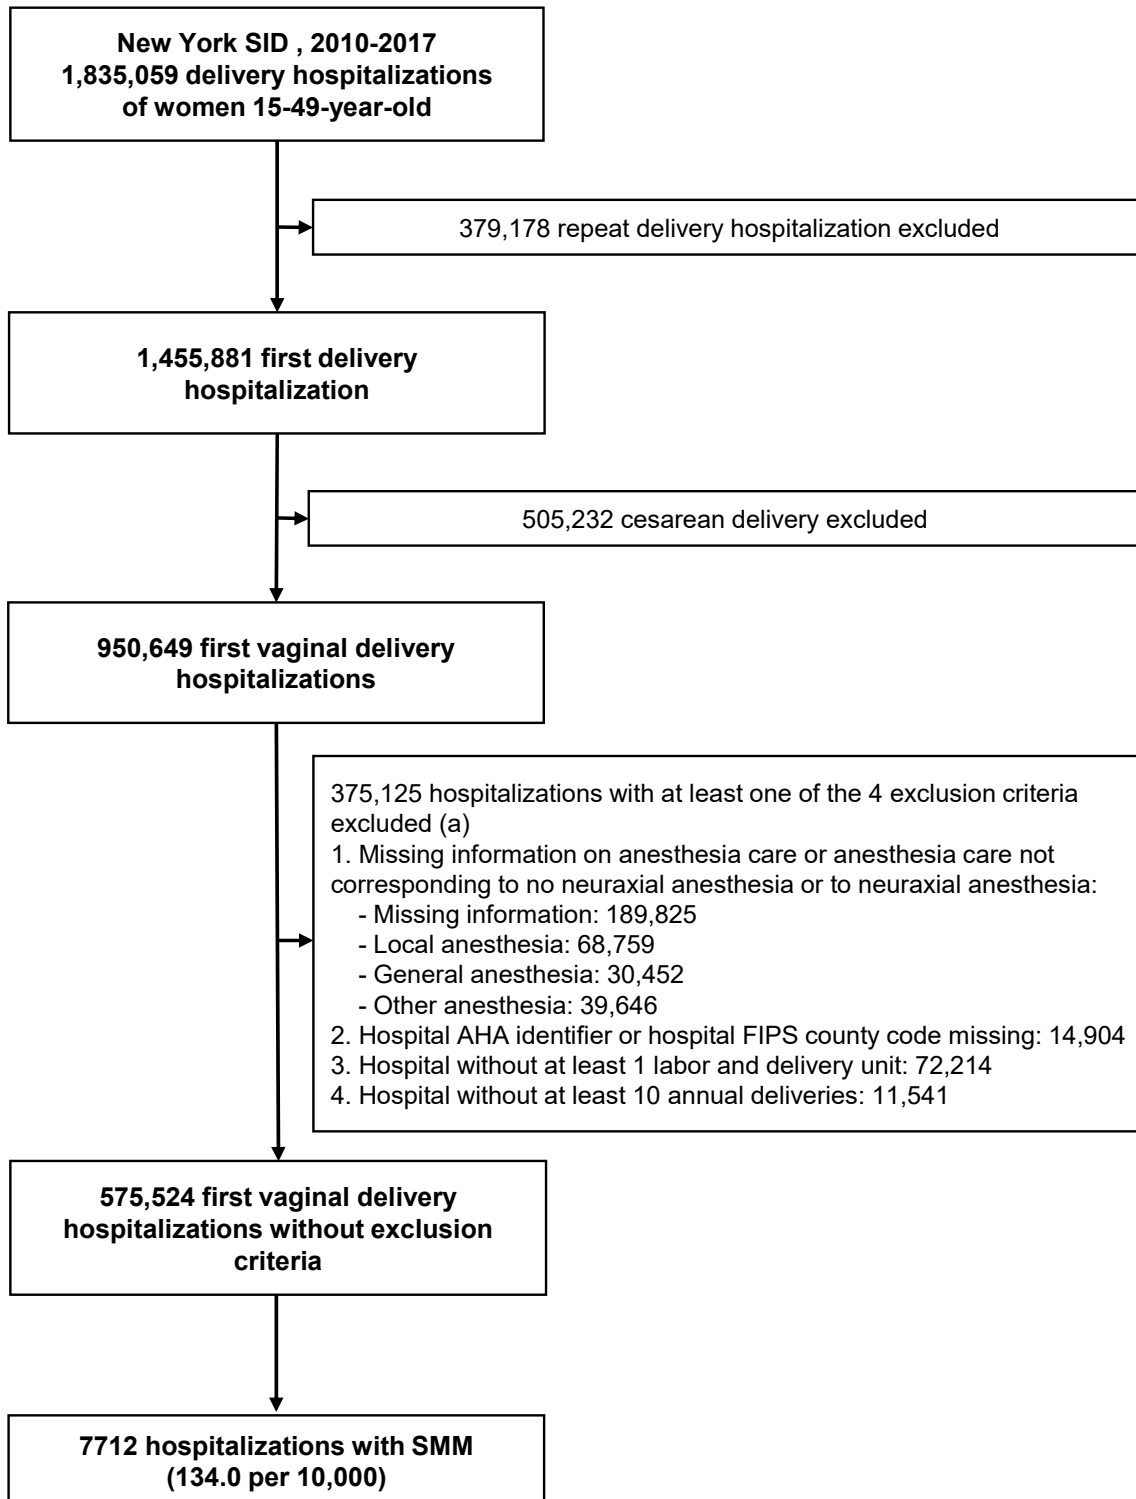

**eTable 4.** Comparison of women who did not receive neuraxial analgesia for vaginal delivery and those who did, before and after propensity-score matching (New York State hospitals, 2010-2017).

|                                        | Before matching                         |                                      |              | After matching                         |                                     |       |
|----------------------------------------|-----------------------------------------|--------------------------------------|--------------|----------------------------------------|-------------------------------------|-------|
|                                        | No neuraxial analgesia<br>(n = 302,603) | Neuraxial analgesia<br>(n = 272,921) | SMD          | No neuraxial analgesia<br>(n = 96,407) | Neuraxial analgesia<br>(n = 96,407) | SMD   |
| <i>General characteristics</i>         |                                         |                                      |              |                                        |                                     |       |
| Age (year)                             |                                         |                                      | 7.3%         |                                        |                                     | 4.5%  |
| ≤ 19                                   | 21,983 (7.3%)                           | 17,594 (6.4%)                        |              | 6414 (6.7%)                            | 7513 (7.8%)                         |       |
| 20-29                                  | 153,824 (50.8%)                         | 131,552 (48.2%)                      |              | 49,860 (51.7%)                         | 49,226 (51.1%)                      |       |
| 30-39                                  | 117,305 (38.8%)                         | 115,127 (42.2%)                      |              | 37,106 (38.5%)                         | 36,797 (38.2%)                      |       |
| ≥ 40                                   | 9491 (3.1%)                             | 8648 (3.2%)                          |              | 3027 (3.1%)                            | 2871 (3.0%)                         |       |
| Race (missing = 3206)                  |                                         |                                      | <b>30.8%</b> |                                        |                                     | <0.1% |
| Non-Hispanic White                     | 118,533 (39.5%)                         | 139,743 (51.4%)                      |              | 45,562 (47.3%)                         | 45,562 (47.3%)                      |       |
| Non-Hispanic Black                     | 54,749 (18.2%)                          | 33,828 (12.4%)                       |              | 13,861 (14.4%)                         | 13,861 (14.4%)                      |       |
| Hispanic                               | 65,924 (22.0%)                          | 38,942 (14.3%)                       |              | 17,872 (18.5%)                         | 17,872 (18.5%)                      |       |
| Non-Hispanic Asian or Pacific Islander | 20,796 (6.9%)                           | 25,269 (9.3%)                        |              | 6627 (6.9%)                            | 6627 (6.9%)                         |       |
| Other                                  | 40,219 (13.4%)                          | 34,315 (12.6%)                       |              | 12,485 (13.0%)                         | 12,485 (13.0%)                      |       |
| Rural residence (missing = 1761)       | 19,261 (6.4%)                           | 12,517 (4.6%)                        | 7.9%         | 6970 (7.2%)                            | 6858 (7.1%)                         | <0.1% |
| Insurance type (missing = 3)           |                                         |                                      | <b>39.0%</b> |                                        |                                     | 6.9%  |
| Medicaid                               | 172,351 (57.0%)                         | 111,516 (40.9%)                      |              | 51,011 (52.9%)                         | 50,013 (51.9%)                      |       |
| Medicare                               | 1382 (0.5%)                             | 1101 (0.4%)                          |              | 480 (0.5%)                             | 452 (0.5%)                          |       |
| Private                                | 109,611 (36.2%)                         | 149,732 (54.9%)                      |              | 39,700 (41.2%)                         | 40,412 (41.9%)                      |       |
| Self-pay (uninsured)                   | 11,354 (3.8%)                           | 4494 (1.6%)                          |              | 1690 (1.8%)                            | 2533 (2.6%)                         |       |
| Other                                  | 7902 (2.6%)                             | 6078 (2.2%)                          |              | 3526 (3.7%)                            | 2997 (3.1%)                         |       |
| CMI-OB ≥ 1                             | 88,132 (29.1%)                          | 87,046 (31.9%)                       | 6.0%         | 28,732 (29.8%)                         | 28,732 (29.8%)                      | <0.1% |
| Obesity                                | 15,349 (5.1%)                           | 13,579 (5.0%)                        | <1.0%        | 4216 (4.4%)                            | 3468 (3.6%)                         | 4.0%  |

**eTable 4 (continued)**

|                                                                          | Before matching                         |                                      |              | After matching                         |                                     |       |
|--------------------------------------------------------------------------|-----------------------------------------|--------------------------------------|--------------|----------------------------------------|-------------------------------------|-------|
|                                                                          | No neuraxial analgesia<br>(n = 302,603) | Neuraxial analgesia<br>(n = 272,921) | SMD          | No neuraxial analgesia<br>(n = 96,407) | Neuraxial analgesia<br>(n = 96,407) | SMD   |
| <i>Possible contraindications to neuraxial anesthesia</i>                |                                         |                                      |              |                                        |                                     |       |
| Coagulation factor deficit, Von Willebrand disease, and thrombocytopenia | 5757 (1.9%)                             | 6107 (2.2%)                          | 2.4%         | 2003 (2.1%)                            | 1851 (1.9%)                         | 1.1%  |
| Fever or infection during labor                                          | 2412 (0.8%)                             | 2634 (1.0%)                          | 1.8%         | 596 (0.6%)                             | 558 (0.6%)                          | <0.1% |
| Chorioamnionitis                                                         | 6044 (2.0%)                             | 7622 (2.8%)                          | 5.2%         | 1676 (1.7%)                            | 1748 (1.8%)                         | <0.1% |
| <i>Pregnancy and labor characteristics</i>                               |                                         |                                      |              |                                        |                                     |       |
| Admission for delivery during a weekend                                  | 72,604 (24.0%)                          | 64,144 (23.5%)                       | 1.2%         | 23,143 (24.0%)                         | 22,835 (23.7%)                      | <0.1% |
| Pregnancy resulting from ART                                             | 553 (0.2%)                              | 1148 (0.4%)                          | 4.2%         | 233 (0.2%)                             | 265 (0.3%)                          | <0.1% |
| Previous cesarean delivery                                               | 8257 (2.7%)                             | 7476 (2.7%)                          | <1.0%        | 2692 (2.8%)                            | 2977 (3.1%)                         | 1.8%  |
| Uterus fibroid                                                           | 2392 (0.8%)                             | 2485 (0.9%)                          | 1.3%         | 705 (0.7%)                             | 692 (0.7%)                          | <0.1% |
| Polyhydramnios                                                           | 1911 (0.6%)                             | 2308 (0.8%)                          | 2.5%         | 663 (0.7%)                             | 670 (0.7%)                          | <0.1% |
| Placenta praevia                                                         | 401 (0.1%)                              | 360 (0.1%)                           | <0.1%        | 145 (0.2%)                             | 142 (0.1%)                          | <0.1% |
| Placenta accreta                                                         | 913 (0.3%)                              | 1171 (0.4%)                          | 2.1%         | 354 (0.4%)                             | 393 (0.4%)                          | <0.1% |
| Multiple gestation                                                       | 2003 (0.7%)                             | 2495 (0.9%)                          | 2.9%         | 732 (0.8%)                             | 843 (0.9%)                          | 1.3%  |
| Abnormal presentation                                                    | 8999 (3.0%)                             | 8062 (3.0%)                          | <1.0%        | 3118 (3.2%)                            | 2984 (3.1%)                         | <0.1% |
| Preterm delivery                                                         | 17,077 (5.6%)                           | 12,705 (4.7%)                        | 4.5%         | 5912 (6.1%)                            | 5879 (6.1%)                         | <0.1% |
| Premature rupture of membranes                                           | 17,461 (5.8%)                           | 24,265 (8.9%)                        | <b>12.0%</b> | 6169 (6.4%)                            | 5962 (6.2%)                         | <0.1% |
| Induction of labor                                                       | 56,458 (18.7%)                          | 67,178 (24.6%)                       | <b>14.5%</b> | 19,887 (20.6%)                         | 19,845 (20.6%)                      | <0.1% |
| Abnormal fetal heart rhythm                                              | 38,509 (12.7%)                          | 50,405 (18.5%)                       | <b>15.9%</b> | 11,964 (12.4%)                         | 10,905 (11.3%)                      | 3.4%  |

**eTable 4 (continued)**

|                                                                                    | Before matching                         |                                      |               | After matching                         |                                     |              |
|------------------------------------------------------------------------------------|-----------------------------------------|--------------------------------------|---------------|----------------------------------------|-------------------------------------|--------------|
|                                                                                    | No neuraxial analgesia<br>(n = 302,603) | Neuraxial analgesia<br>(n = 272,921) | SMD           | No neuraxial analgesia<br>(n = 96,407) | Neuraxial analgesia<br>(n = 96,407) | SMD          |
| <i>Hospital characteristics</i>                                                    |                                         |                                      |               |                                        |                                     |              |
| Teaching hospital                                                                  | 240,277 (79.4%)                         | 229,617 (84.1%)                      | <b>12.3%</b>  | 74,439 (77.2%)                         | 74,926 (77.7%)                      | 1.2%         |
| Rural hospital                                                                     | 16,330 (5.4%)                           | 7461 (2.7%)                          | <b>13.5%</b>  | 4965 (5.2%)                            | 4532 (4.7%)                         | 2.1%         |
| Annual number of deliveries                                                        | 2684 (1797)                             | 3455 (2137)                          | <b>39.1%</b>  | 3018 (2241)                            | 2999 (1995)                         | <0.1%        |
| Cesarean delivery rate                                                             | 33.3% (6.5)                             | 34.4% (6.5)                          | <b>16.7%</b>  | 32.9% (7.1)                            | 33.1% (6.8)                         | 3.2%         |
| Proportion of induction of labor                                                   | 16.4% (7.6)                             | 18.3% (7.8)                          | <b>24.9%</b>  | 17.7% (8.0)                            | 17.4% (8.3)                         | 3.9%         |
| Proportion of racial and ethnic minority women                                     | 57.9% (31.2)                            | 48.7% (26.3)                         | <b>32.2%</b>  | 49.2% (28.7)                           | 48.0% (28.6)                        | 4.1%         |
| Proportion of safety net women (a)                                                 | 58.2% (27.5)                            | 43.5% (24.2)                         | <b>56.8%</b>  | 51.4% (23.6)                           | 51.5% (23.9)                        | <0.1%        |
| Proportion of women with CMI-OB ≥ 1                                                | 43.0% (6.5)                             | 45.3% (7.1)                          | <b>33.8%</b>  | 43.0% (7.4)                            | 42.2% (7.5)                         | <b>11.2%</b> |
| Proportion of admission for delivery during a weekend                              | 20.7% (2.0)                             | 20.5% (2.2)                          | 7.4%          | 20.7% (2.2)                            | 20.6% (2.1)                         | 2.7%         |
| Proportion of neuraxial techniques in deliveries                                   | 22.1% (28.0)                            | 71.8% (17.3)                         | <b>213.3%</b> | 57.7% (17.9)                           | 58.7% (18.5)                        | 5.4%         |
| Coding intensity                                                                   | 8.0 (1.5)                               | 8.3 (1.6)                            | <b>24.9%</b>  | 8.1 (1.6)                              | 7.8 (1.6)                           | <b>17.9%</b> |
| <i>Hospital county characteristics (per 1000 in-hospital births in the county)</i> |                                         |                                      |               |                                        |                                     |              |
| Number of obstetricians and gynecologists                                          | 13.4 (4.7)                              | 14.7 (4.7)                           | <b>27.7%</b>  | 13.5 (5.3)                             | 13.3 (4.9)                          | 4.1%         |
| Number of physician anesthesiologists                                              | 15.5 (6.9)                              | 17.7 (6.2)                           | <b>33.8%</b>  | 16.0 (7.3)                             | 15.6 (6.4)                          | 5.5%         |
| Number of certified registered nurse anesthetists                                  | 4.9 (4.4)                               | 6.3 (5.5)                            | <b>27.9%</b>  | 5.9 (6.0)                              | 5.6 (5.4)                           | 5.4%         |
| <i>Other</i>                                                                       |                                         |                                      |               |                                        |                                     |              |
| Year of delivery                                                                   |                                         |                                      | 5.1%          |                                        |                                     | <b>66.7%</b> |
| 2010-2011                                                                          | 91,737 (30.3%)                          | 79,609 (29.2%)                       |               | 29,327 (30.4%)                         | 55,840 (57.9%)                      |              |
| 2012-2013                                                                          | 79,802 (26.4%)                          | 69,220 (25.4%)                       |               | 24,877 (25.8%)                         | 23,706 (24.6%)                      |              |
| 2014-2015                                                                          | 75,845 (25.1%)                          | 69,411 (25.4%)                       |               | 24,472 (25.4%)                         | 10,715 (11.1%)                      |              |
| 2016-2017                                                                          | 55,219 (18.2%)                          | 54,681 (20.0%)                       |               | 17,731 (18.4%)                         | 6146 (6.4%)                         |              |

*Abbreviations:* ART: assisted reproductive technology; CMI-OB: comorbidity index for obstetric patients; SMD: standardized mean difference.

*Footnote:* Results expressed as count (%) or mean (1 standard deviation).

(a) Safety net women are Medicaid beneficiaries, Medicare beneficiaries, and uninsured

**eTable 5.** Odds ratios of postpartum hemorrhage associated with neuraxial analgesia for vaginal delivery with the successive addition of patient and hospital characteristics in the propensity score used for weighting (New York State hospitals, 2010-2017)

| No neuraxial analgesia                                                                                                                                                               |               |                       | Neuraxial analgesia |               |                       | Risk difference (%) | OR (95% CI)              |
|--------------------------------------------------------------------------------------------------------------------------------------------------------------------------------------|---------------|-----------------------|---------------------|---------------|-----------------------|---------------------|--------------------------|
| No. of women                                                                                                                                                                         | Nb. of events | Incidence (%; 95% CI) | No. of women        | Nb. of events | Incidence (%; 95% CI) |                     |                          |
| <i>Step 1: General characteristics (a)</i>                                                                                                                                           |               |                       |                     |               |                       |                     |                          |
| 299,171                                                                                                                                                                              | 9674          | 3.23 (3.17, 3.30)     | 271,462             | 9334          | 3.44 (3.37, 3.51)     | 0.21                | 1.07 (1.04, 1.10)        |
| <i>Step 2: General characteristics and possible contraindications to neuraxial anesthesia (b)</i>                                                                                    |               |                       |                     |               |                       |                     |                          |
| 299,186                                                                                                                                                                              | 9769          | 3.27 (3.20, 3.33)     | 271,451             | 9255          | 3.41 (3.34, 3.48)     | 0.14                | 1.05 (1.02, 1.08)        |
| <i>Step 3: General characteristics, possible contraindications to neuraxial anesthesia, and labor characteristics (c)</i>                                                            |               |                       |                     |               |                       |                     |                          |
| 299,319                                                                                                                                                                              | 9859          | 3.29 (3.23, 3.36)     | 270,805             | 9128          | 3.37 (3.30, 3.44)     | 0.08                | 1.02 (0.99, 1.05)        |
| <i>Step 4: General characteristics, possible contraindications to neuraxial anesthesia, labor characteristics, and hospital characteristics (d)</i>                                  |               |                       |                     |               |                       |                     |                          |
| 303,803                                                                                                                                                                              | 10823         | 3.56 (3.44, 3.68)     | 219,802             | 7265          | 3.31 (3.20, 3.41)     | -0.25               | <b>0.93 (0.90, 0.95)</b> |
| <i>Step 5: General characteristics, possible contraindications to neuraxial anesthesia, labor characteristics, hospital characteristics, and hospital county characteristics (e)</i> |               |                       |                     |               |                       |                     |                          |
| 304,651                                                                                                                                                                              | 10791         | 3.54 (3.42, 3.66)     | 219,340             | 7279          | 3.32 (3.21, 3.43)     | -0.22               | <b>0.93 (0.91, 0.96)</b> |

(a) General characteristics include: 1) age, 2) race and ethnicity, 3) health insurance type, 4) rural residence, 5) comorbidity index for obstetric patients, and 6) obesity.

(b) Possible contraindications to neuraxial anesthesia include: 1) coagulation factor deficit, Von Willebrand disease, and thrombocytopenia, 2) fever or infection during labor, and 3) chorioamnionitis.

(c) Labor characteristics include: 1) admission during a weekend, 2) pregnancy resulting from assisted reproductive technology, 3) previous cesarean delivery, 4) uterus fibroid, 5) polyhydramnios, 6) placenta praevia, 7) placenta accrete, 8) multiple gestation, 9) abnormal presentation, 10) preterm delivery, 11) premature rupture of membranes, 12) induction of labor, and 13) abnormal fetal heart rhythm.

(d) Hospital characteristics include: 1) teaching hospital, 2) rural hospital, 3) annual number of deliveries, 4) cesarean delivery rate, 5) proportion of induced of labor, 6) proportion of racial and ethnic minority women, 7) proportion of safety net women, 8) proportion of women with comorbidity index for obstetric patients  $\geq 1$ , 9) proportion of admission for delivery during a weekend, 10) proportion of neuraxial analgesic or anesthetic techniques in deliveries, and 11) coding intensity.

(e) Hospital county characteristics include: 1) number of obstetricians and gynecologists, 2) number of physician anesthesiologists, and 3) number of certified registered nurse anesthetist.

**eTable 6.** Odds ratios of postpartum hemorrhage associated with neuraxial analgesia for vaginal delivery with the individual addition of each of the hospital characteristics to the propensity score used for weighting (New York State hospitals, 2010-2017)

In addition to each hospital characteristics, the propensity score include the 22 general characteristics, possible contraindications to neuraxial anesthesia, and labor characteristics reported in **eTable 3**.

| No neuraxial analgesia                                                          |               |                       | Neuraxial analgesia |               |                       | Risk difference (%) | OR (95% CI)              |
|---------------------------------------------------------------------------------|---------------|-----------------------|---------------------|---------------|-----------------------|---------------------|--------------------------|
| No. of women                                                                    | Nb. of events | Incidence (%; 95% CI) | No. of women        | Nb. of events | Incidence (%; 95% CI) |                     |                          |
| <i>Proportion of neuraxial analgesic or anesthetic techniques in deliveries</i> |               |                       |                     |               |                       |                     |                          |
| 302,890                                                                         | 10,698        | 3.53 (3.42 ,3.65)     | 218,145             | 7271          | 3.33 (3.23 ,3.43)     | -0.20               | <b>0.94 (0.91 ,0.97)</b> |
| <i>Coding intensity</i>                                                         |               |                       |                     |               |                       |                     |                          |
| 298,818                                                                         | 10,071        | 3.37 (3.30 ,3.44)     | 271,739             | 8947          | 3.29 (3.22 ,3.36)     | -0.08               | 0.98 (0.95 ,1.00)        |
| <i>Proportion of women with a comorbidity index for obstetric patients ≥ 1</i>  |               |                       |                     |               |                       |                     |                          |
| 298,606                                                                         | 10,073        | 3.37 (3.30 ,3.44)     | 272,091             | 8974          | 3.30 (3.23 ,3.37)     | -0.07               | 0.98 (0.95 ,1.01)        |
| <i>Annual number of deliveries</i>                                              |               |                       |                     |               |                       |                     |                          |
| 300,876                                                                         | 10,036        | 3.34 (3.27 ,3.41)     | 269,670             | 8972          | 3.33 (3.26 ,3.40)     | -0.01               | 1.00 (0.97 ,1.03)        |
| <i>Proportion of induced labor</i>                                              |               |                       |                     |               |                       |                     |                          |
| 298,781                                                                         | 9972          | 3.34 (3.27 ,3.41)     | 271,428             | 9032          | 3.33 (3.26 ,3.40)     | -0.01               | 1.00 (0.97 ,1.03)        |
| <i>Proportion of safety net women</i>                                           |               |                       |                     |               |                       |                     |                          |
| 299,942                                                                         | 9931          | 3.31 (3.24 ,3.38)     | 269,648             | 8994          | 3.34 (3.26 ,3.41)     | 0.03                | 1.01 (0.98 ,1.04)        |
| <i>Proportion of racial and ethnic minority women</i>                           |               |                       |                     |               |                       |                     |                          |
| 299,778                                                                         | 9954          | 3.32 (3.25 ,3.39)     | 270,304             | 9054          | 3.35 (3.28 ,3.42)     | 0.03                | 1.01 (0.98 ,1.04)        |
| <i>Teaching hospital</i>                                                        |               |                       |                     |               |                       |                     |                          |
| 298,988                                                                         | 9926          | 3.32 (3.25 ,3.39)     | 271,804             | 9095          | 3.35 (3.28 ,3.42)     | 0.03                | 1.01 (0.98 ,1.04)        |
| <i>Rural hospital</i>                                                           |               |                       |                     |               |                       |                     |                          |
| 299,072                                                                         | 9883          | 3.30 (3.24 ,3.37)     | 271,623             | 9129          | 3.36 (3.29 ,3.43)     | 0.06                | 1.02 (0.99 ,1.05)        |
| <i>Proportion of admission for delivery during a weekend</i>                    |               |                       |                     |               |                       |                     |                          |
| 299,185                                                                         | 9880          | 3.30 (3.24 ,3.37)     | 271,371             | 9136          | 3.37 (3.30 ,3.44)     | 0.07                | 1.02 (0.99 ,1.05)        |
| <i>Cesarean delivery rate</i>                                                   |               |                       |                     |               |                       |                     |                          |
| 299,633                                                                         | 9855          | 3.29 (3.22 ,3.36)     | 270,707             | 9126          | 3.37 (3.30 ,3.44)     | 0.08                | <b>1.03 (1.00 ,1.06)</b> |
